# Supplementary material for: Recombinant Oil-Body-Expressed Oleosin-hFGF5 in Arabidopsis thaliana Regulates Hair Growth
Source: MDPI journal article supplement (doi:10.3390/genes14010021), 2022-12-22
Supplement: s1 [file s1]

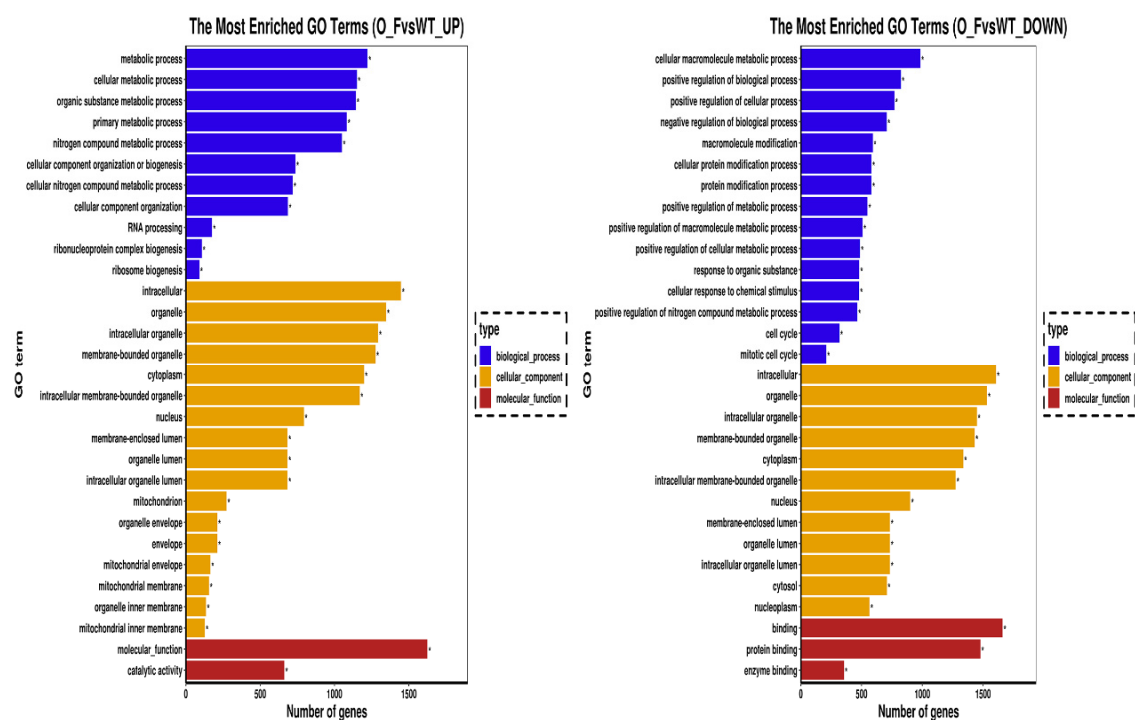

**Figure S1. Differential gene enrichment analysis by KEGG.**



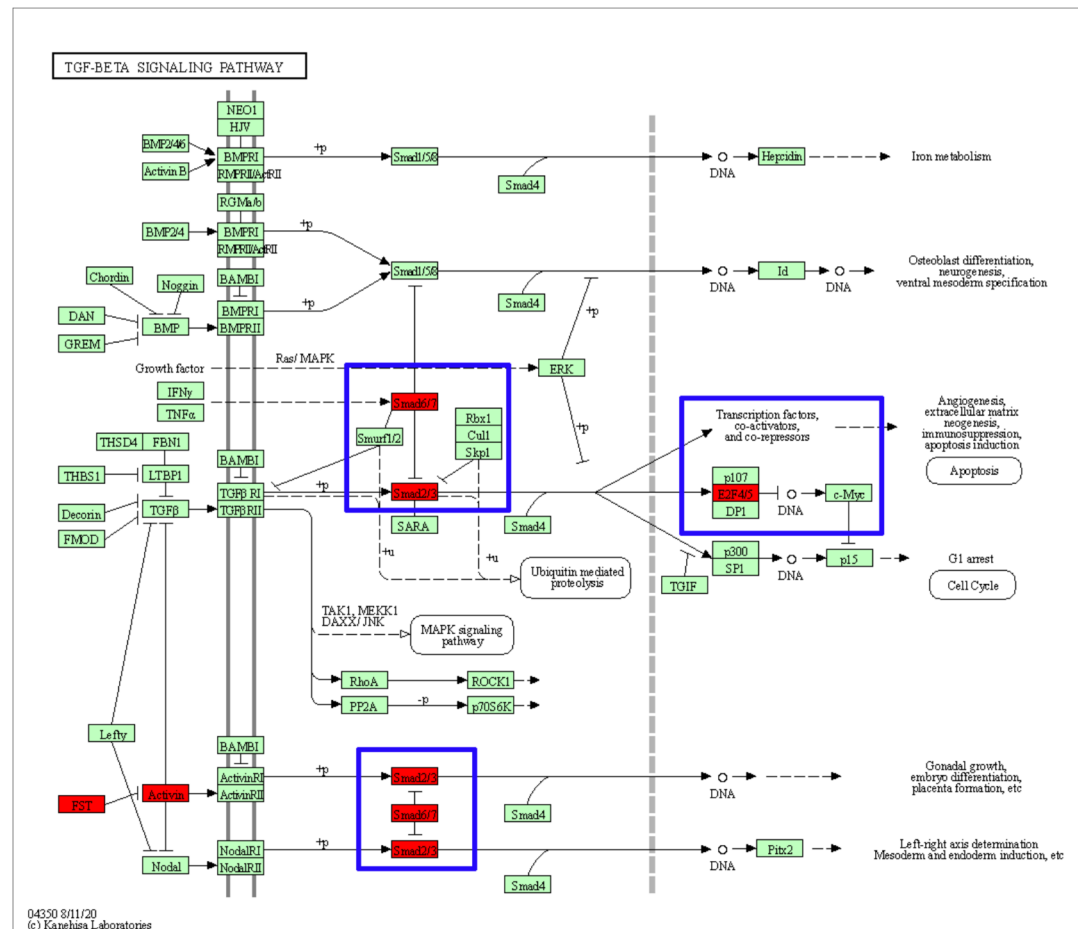

**Figure S3. The recombinant oil body expressing hFGF5 regulates E2F4, E2F5, Smad7 and participates in TGF- $\beta$  pathway. The blue box indicates that the target gene is involved in the regulation process, and the red marked gene indicates that the up-regulation of gene expression induced by ROBF5 treatment may be involved in the TGF- $\beta$  pathway.**

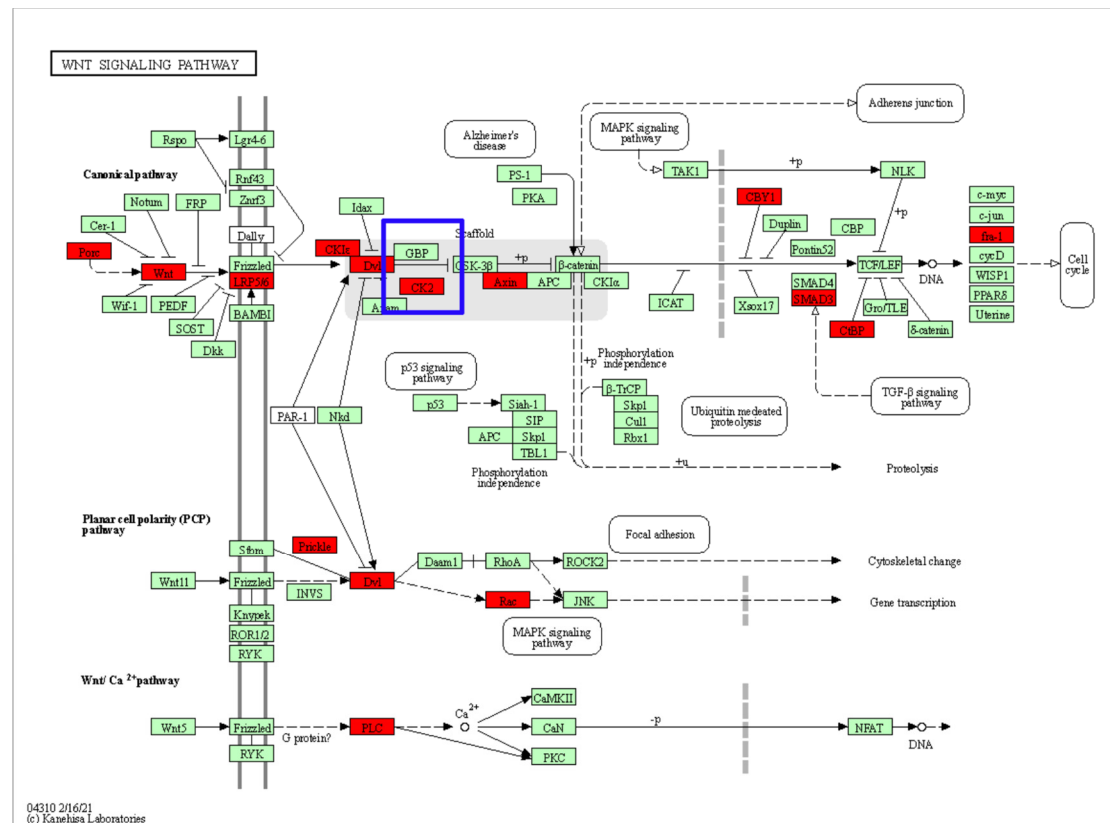

**Figure S4. The recombinant oil body expressing hFGF5 regulates CSNK1 and participates in Wnt pathway.** The blue box indicates that the target gene is involved in the regulation process, and the red marked gene indicates that the up-regulation of gene expression induced by ROBF5 treatment may be involved in the Wnt pathway.





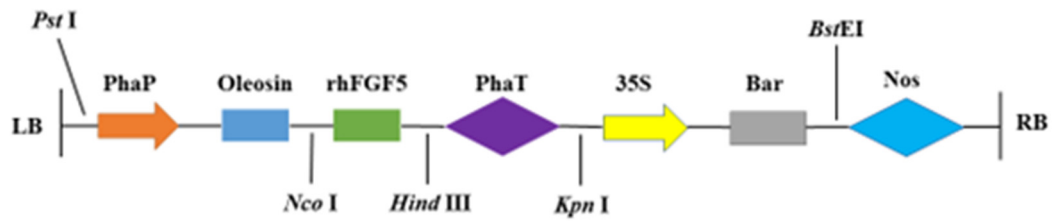

**Figure S7. pOTB-hFGF5 expression vector.** PhaP: phaseolin promoter; Oleosin: Arabidopsis thaliana oleosin gene; hFGF5: human fibroblast growth factor 5; PhaT: phaseolin terminator; 35S: CaMV35S promoter; Bar: the glufosinate resistance gene; Nos: Nopaline synthase terminator.

**Table S1. Sequence of primers.**

| <b>Primer</b> | <b>Sequence of primers 5'to3'</b> |
|---------------|-----------------------------------|
| 1-E2F5-F      | GAAATGGGTCAGAATGGACAAAA           |
| 1-E2F5-R      | AACCACGGGCTTAGATGAACTC            |
| 2-ID2-F       | GAACAAGAAGGTGAGCAAGATGG           |
| 2-ID2-R       | CTGACAATAGTGGGATGCGAGT            |
| 3-BAX-F       | TCCCACCTTCCTAAATGTCTGTC           |
| 3-BAX-R       | GCATCCACCGCACACTAAAGA             |
| 4-SMAD7-F     | GGGAGGAGAAGACGAGAGTGG             |
| 4-SMAD7-R     | CTTGTTGTCCGAATTGAGCTGT            |
| 5-E2F4-F      | TGGAAGGTATCGGGCTAATCG             |
| 5-E2F4-R      | ATGAGTGACGTAGGCCAAAGTGT           |
| 6-CSNK1E-F    | TTCAACTTCTGTTCCCGCAA              |
| 6-CSNK1E-R    | GTGGATGAAGTTCTTGAGTGGA            |
| 7-PIK3R3-F    | CTCTCCACCAAAGCCACCTAA             |
| 7-PIK3R3-R    | TTGAAATATCCCCCAGTACCA             |
| 8-SOS1-F      | GGAACTATTCTTCTACCCCATGG           |
| 8-SOS1-R      | CTCCACCTAAGGGCATCCAA              |
